# Supplementary material for: Seasonal forecasts of droughts in African basins using the Standardized Precipitation Index
Source: Copernicus journal article supplement (doi:10.5194/hess-17-2359-2013), 2013-06-28
Supplement: Supplementary file 1 [file hess-17-2359-2013-supplement.pdf]

## Supplementary material

### Seasonal forecasts of droughts in African basins using the Standardized Precipitation index

E. Dutra<sup>1</sup>, F. Di Giuseppe<sup>1</sup>, F. Wetterhall<sup>1</sup> and F. Pappenberger<sup>1,2</sup>

[1] European Centre for Medium-Range Weather Forecasts, Reading, United Kingdom

[2] College of Hydrology and Water Resources, Hohai University, Nanjing, China

Correspondence to: E. Dutra (emanuel.dutra@ecmwf.int)

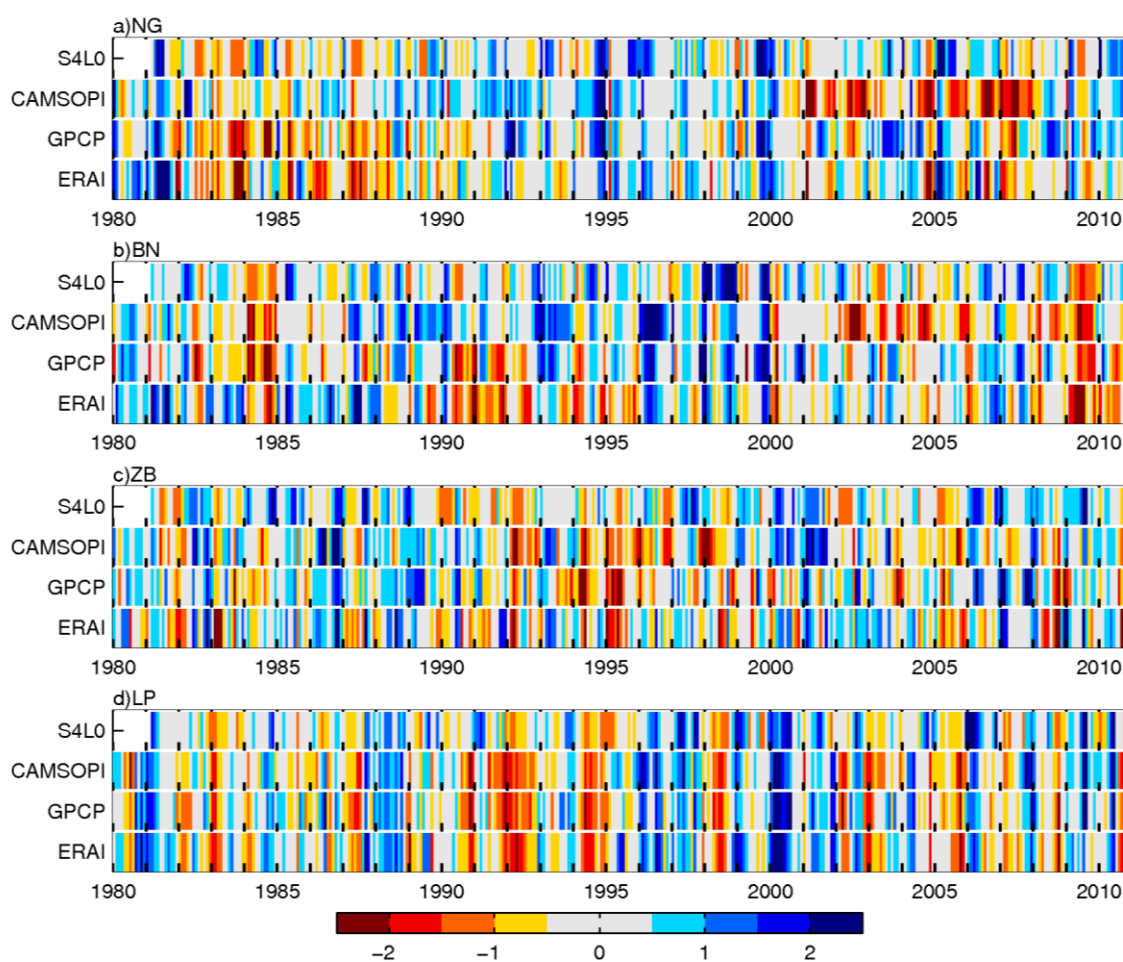

Figure S1. Evolution of the 3-month SPI in the different basins given by S4L0 (first forecast month), CAMS-OPI, GPCP and ERAI precipitation. The horizontal ticks represent January of each year.

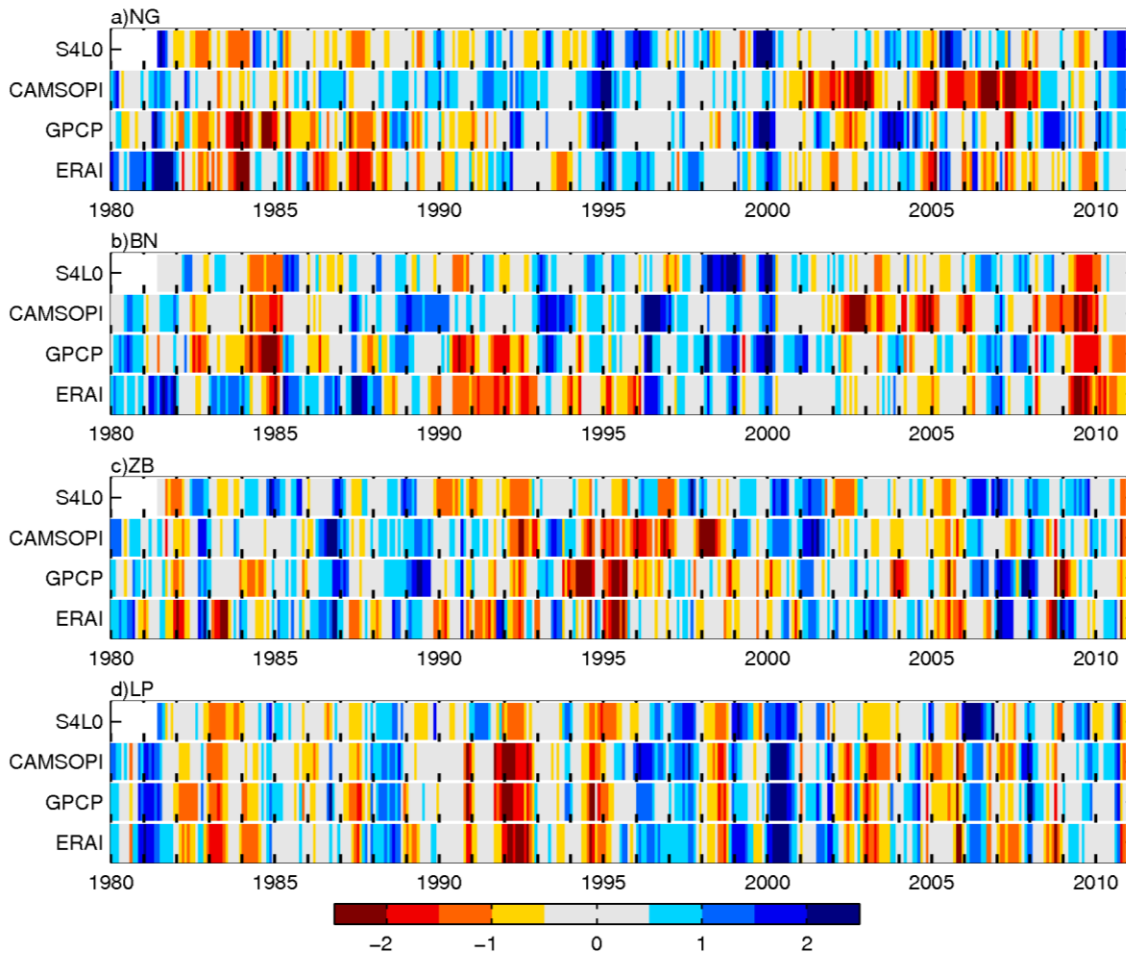

Figure S2. As Figure S1, but for the 6-month SPI.

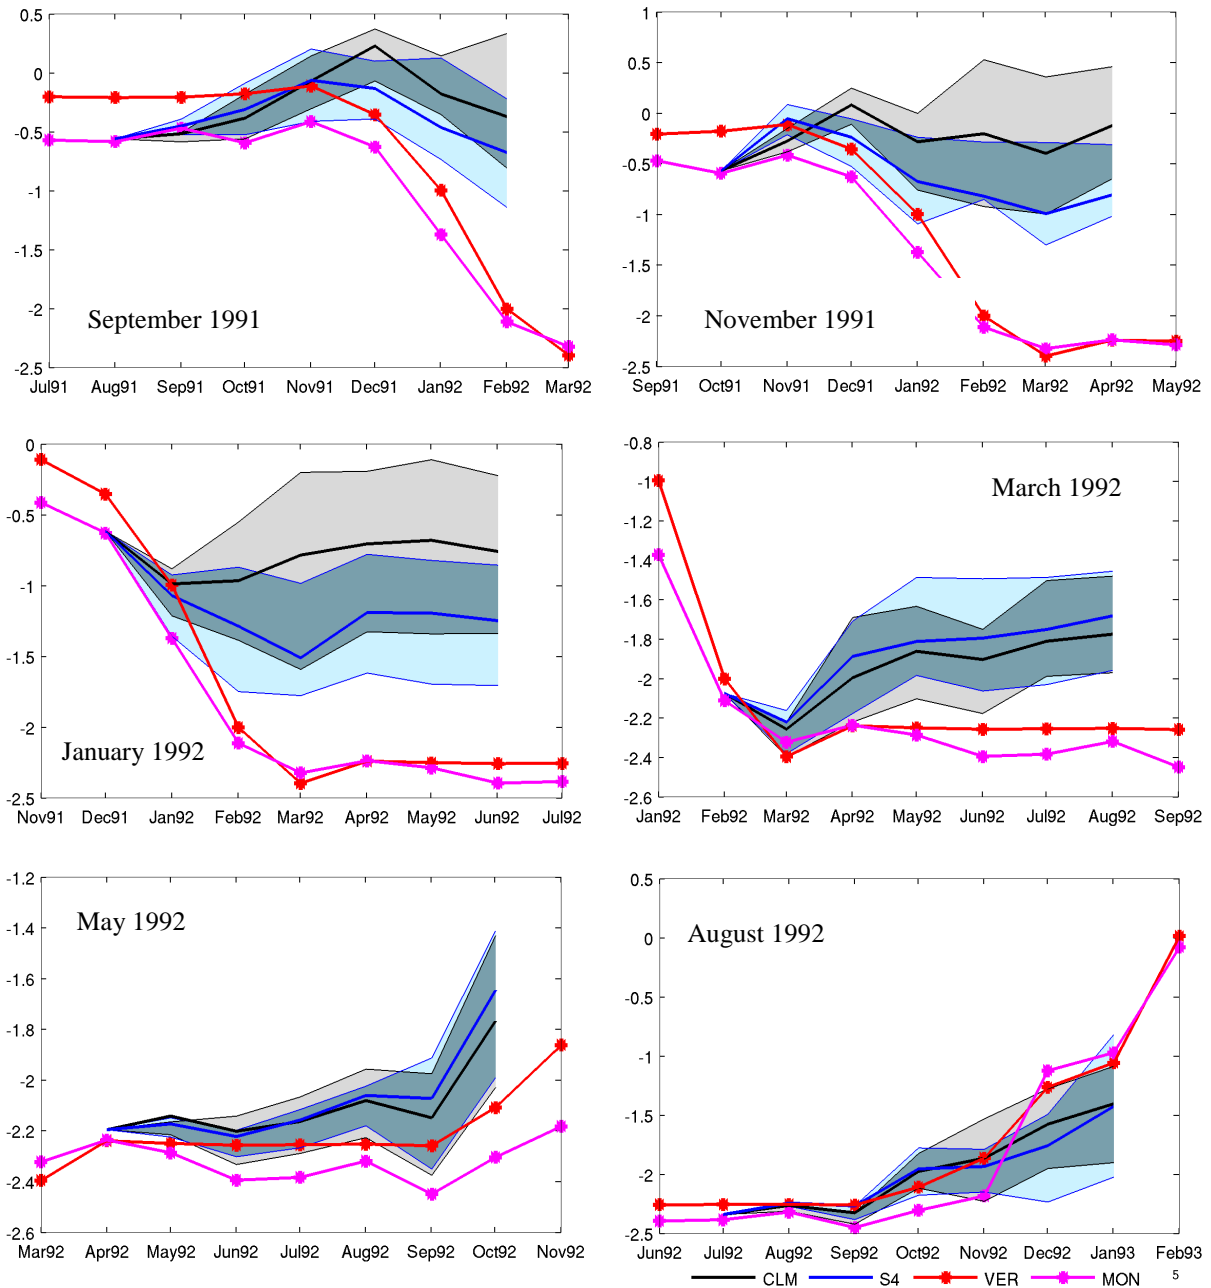

Figure S3. Seasonal forecasts of 12-month SPI for the Limpopo given by system 4 (S4, blue), Climate (CLM, gray), ERAI monitoring (MON, magenta) and verification from GPCP (VER, red). The shaded areas represent the ensemble distribution between the percentile 30 to 70 and the solide lines the ensemble mean.
